# Supplementary material for: DIRECT: RNA contact predictions by integrating structural patterns
Source: PubMed Central journal article supplement (PMC6794908; doi:10.1186/s12859-019-3099-4), 2019-10-15
Supplement: 12859_2019_3099_MOESM1_ESM.pdf [file 12859_2019_3099_MOESM1_ESM.pdf]

1 **Supplementary material:**

2 **DIRECT: RNA Contact Predictions by Integrating Structural Patterns**

3

4 Yiren Jian<sup>1,2+</sup>, Xiaonan Wang<sup>1+</sup>, Jiadi Qiu<sup>1</sup>, Huiwen Wang<sup>1</sup>, Zhichao Liu<sup>2</sup>, Yunjie Zhao<sup>1\*</sup>, Chen  
5 Zeng<sup>2\*</sup>

6

7 Author affiliation:

8 <sup>1</sup>Institute of Biophysics and Department of Physics, Central China Normal University, Wuhan  
9 430079, China

10 <sup>2</sup>Department of Physics, The George Washington University, Washington, DC 20052, USA

11 <sup>+</sup>These authors contributed equally to the paper as first authors

12 <sup>\*</sup>Corresponding author

13

14 Correspondence:

15 Yunjie Zhao Email: yjzhaowh@mail.ccnu.edu.cn

16 Chen Zeng Email: chenz@gwu.edu

17

18

19

20

21

22

23

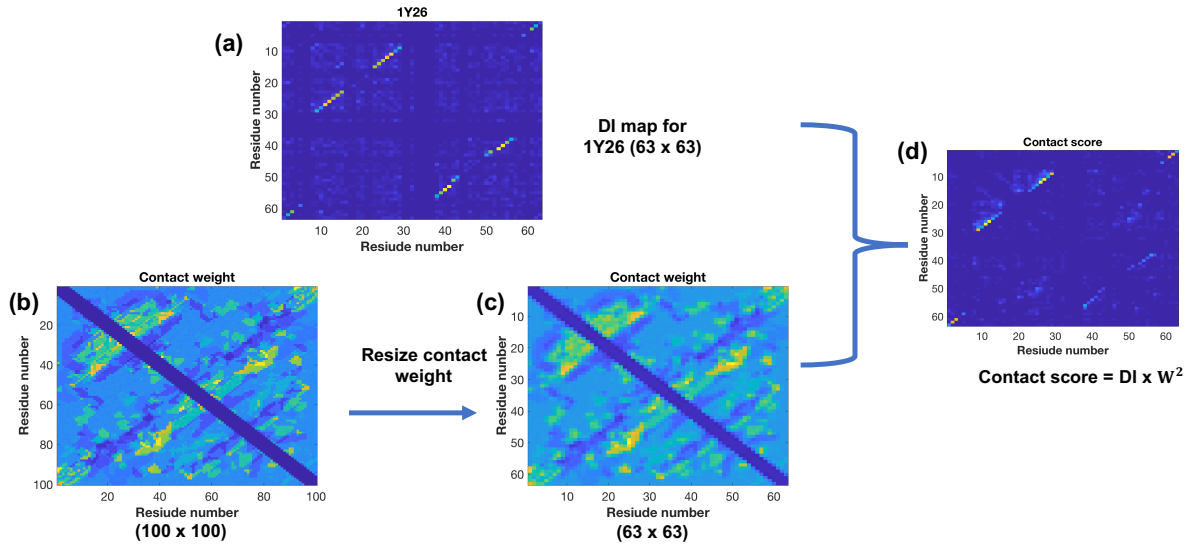

24  
 25 Figure S1: The workflow for DIRECT making contact score. **(a)** The DI score for 1Y26 (with 63  
 26 nucleotides). The DI map is a picture of size 63 x 63. **(b)** A contact weight of size 100 x 100 that  
 27 is trained by RBM. **(c)** To incorporate the contact weight onto the DI map for 1Y26, we resize  
 28 the contact weight from 100 x 100 to 63 x 63. **(d)** The final contact score is  $DI \times W^2$ , where DI is  
 29 DI score and W is contact weight.

30

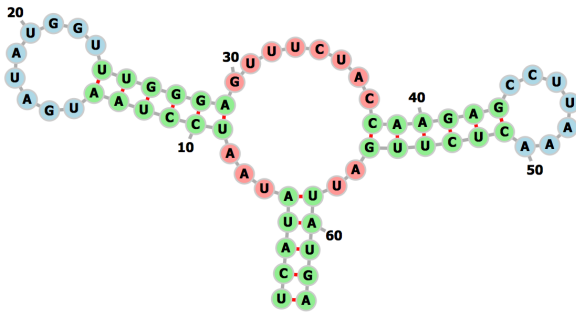

(a) 1Y26 RF00167

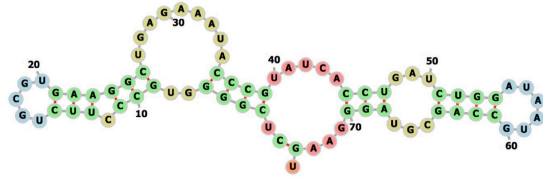

(b) 2GDI RF00059

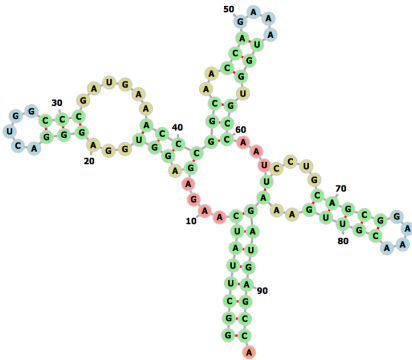

(c) 2GIS RF00162

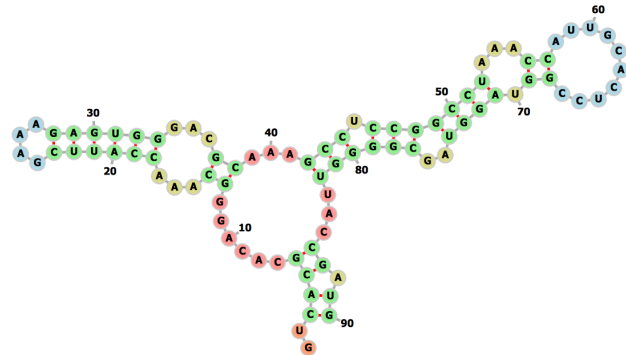

(d) 3IRW RF01051

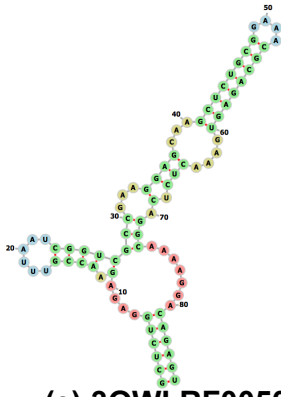

(e) 3OWI RF00504

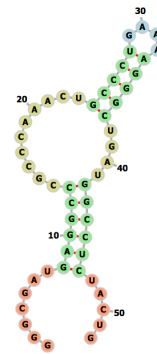

(f) 3VRS RF01734

31  
32

33 Figure S2: The secondary structures of RNAs in the testing set. The green nucleotides are for  
34 base pairs, blue for hairpin loops, yellow for internal/bulge loops, and red for junctions or  
35 exterior loop. The secondary structures are generated by Forna program.

36

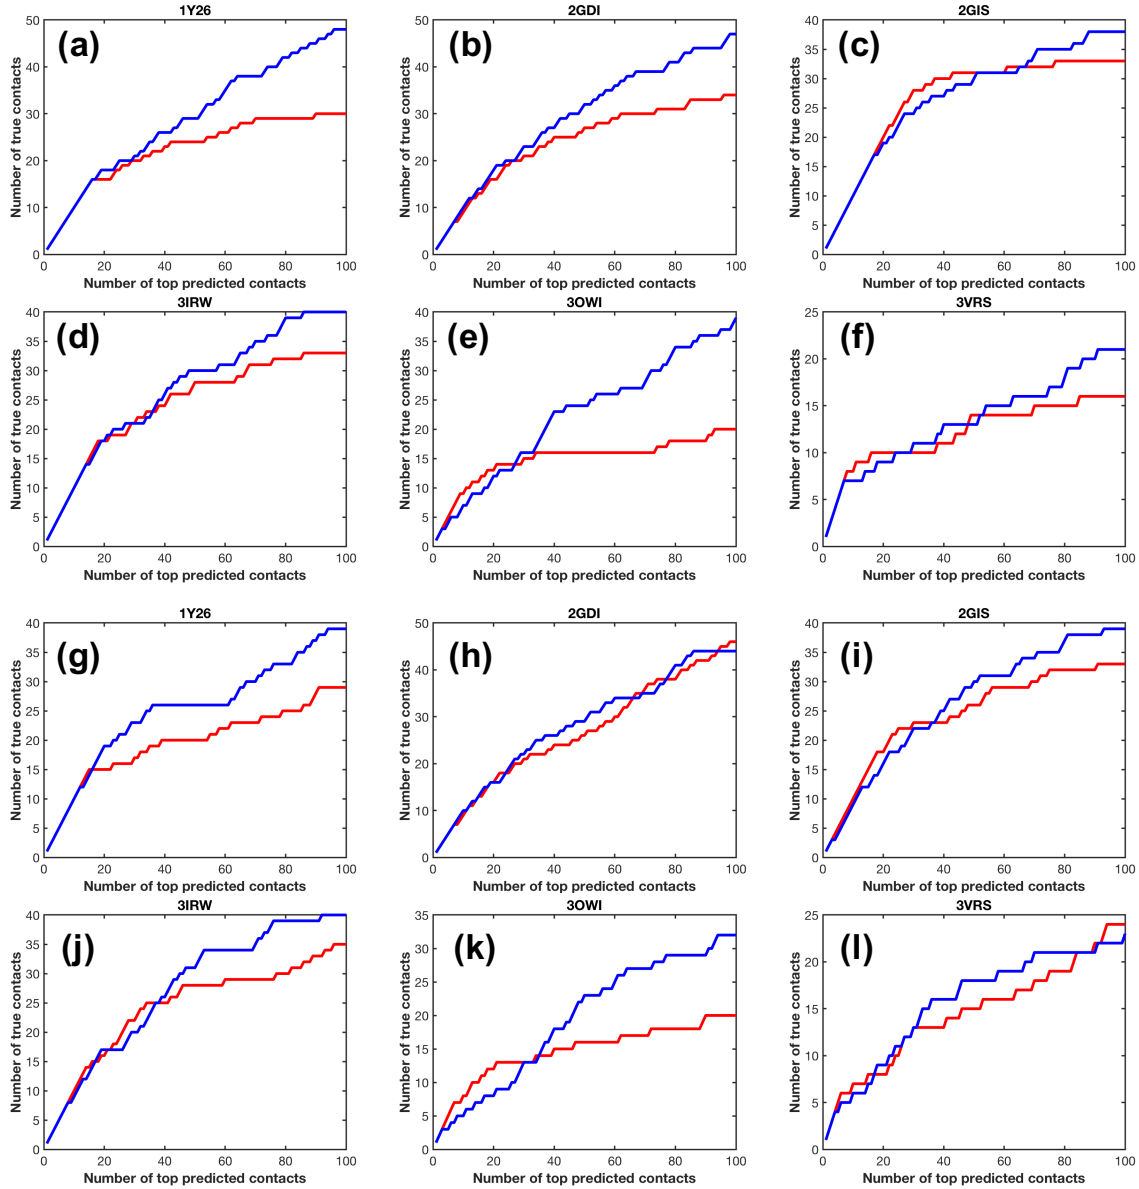

37  
38

39 Figure S3: DIRECT vs. DCA. Accuracy of nucleotide-nucleotide contact prediction for all six  
40 RNAs in the testing set. **(a, b, c, d, e, f)** Comparison between DIRECT and mfDCA. The number  
41 of true contacts among a number of top predicted contacts is shown for each of the six RNAs.  
42 DIRECT (blue lines) achieves 41% higher true positive on average than mfDCA (red lines) for  
43 true contacts among the top 100 predicted contacts. **(g, h, I, j, k, l)** Comparison between  
44 DIRECT and plmDCA. DIRECT (blue lines) achieves 18% higher true positive on average than  
45 plmDCA (red lines) for true contacts among the top 100 predicted contacts.

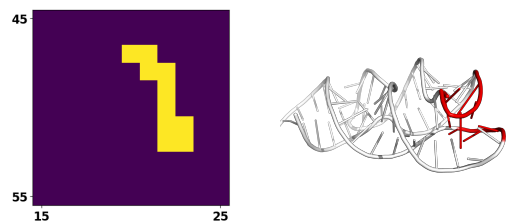

(a) 1Y26

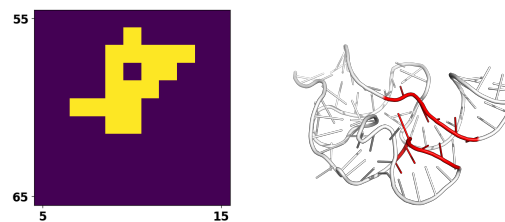

(b) 2GDI

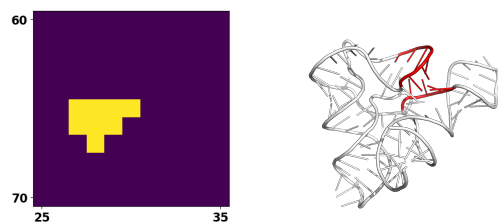

(c) 2GIS

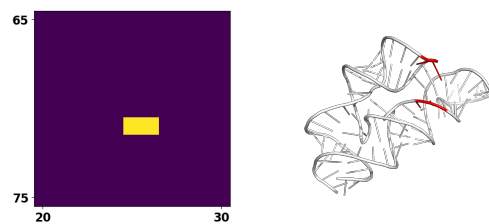

(d) 3IRW

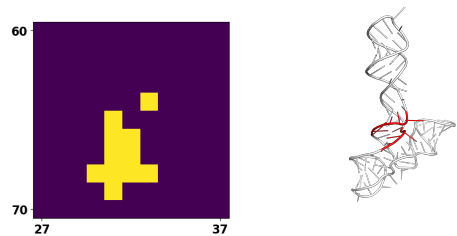

(e) 3OWI

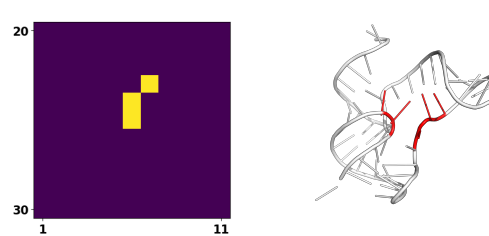

(f) 3VRS

46  
 47 Figure S4: Contact patterns learned by contact weight of Restricted Boltzmann Machine and the  
 48 corresponding structural motifs. The overlaps of real contacts and contact weights learned by  
 49 RBM are shown on the left of (a), (b), (c), (d), (e) and (f). The corresponding structural motifs  
 50 are highlighted in red showing on the right.

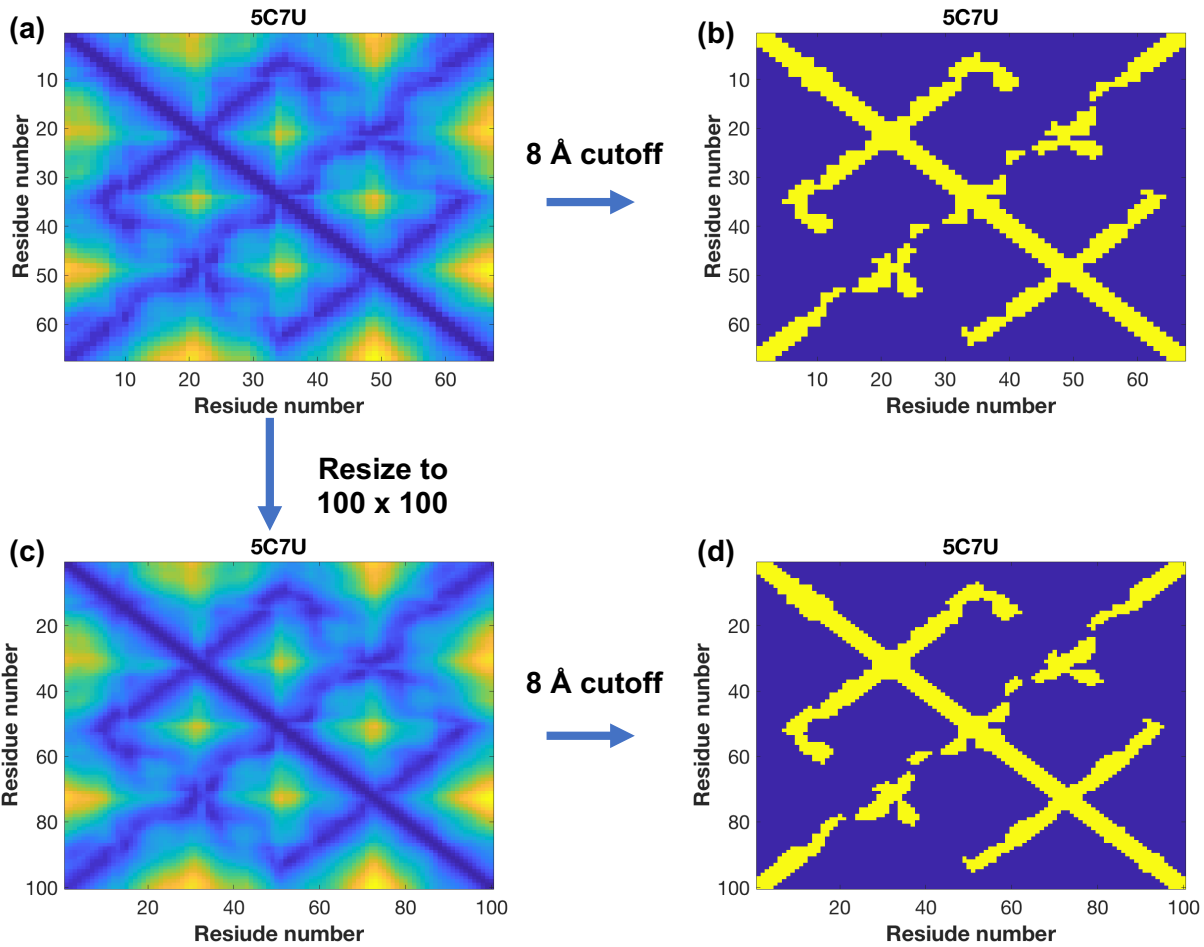

51  
52

53 Figure S5: Distance map resizing and contact map generating. **(a)** A distance map for riboswitch  
 54 5c7u with 67 nucleotides is represented as an image of size 67 x 67. **(b)** By applying a cutoff of 8  
 55 Å, a contact map of size 67 x 67 is generated for 5c7u. **(c)** In order to train a Boltzmann machine  
 56 for riboswitches of different number of nucleotides, we resize the distance map into a fixed size  
 57 of 100 x 100. The example shown here (5c7u) is transformed from a 67 x 67 to a 100 x 100  
 58 distance map. The resizing algorithm for image uses bicubic interpolation. **(d)** Then we apply a  
 59 cutoff of 8 Å on the resized distance map to generate the contact map used for machine training.  
 60 By comparing (a) (c) and (b) (d), we find that the resizing algorithm can keep most the contact  
 61 patterns in the original contact map.

62

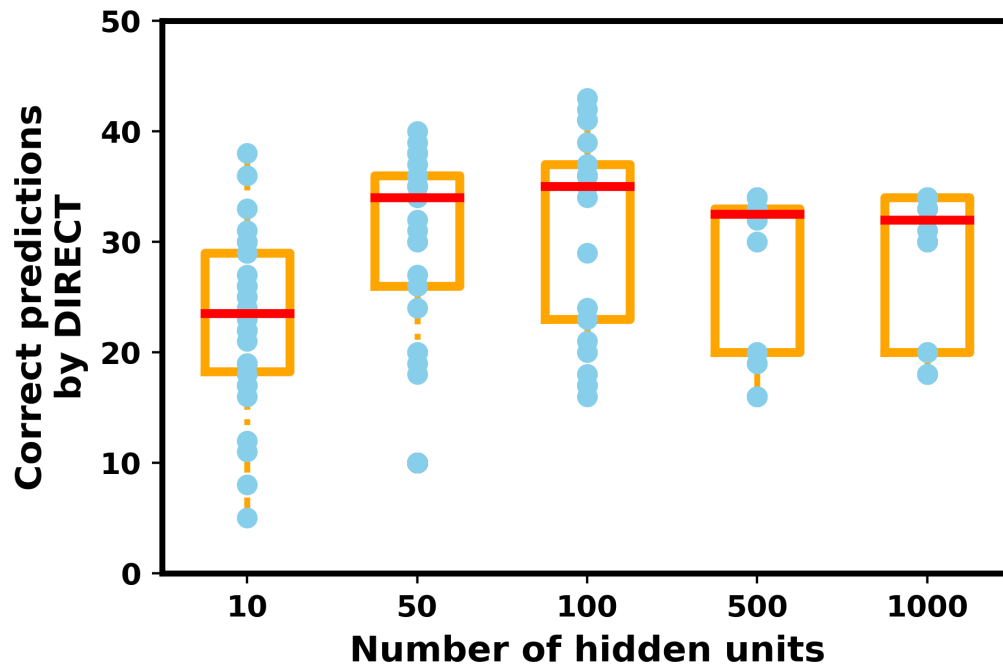

63  
64 Figure S6: The optimal hidden units. We go through a grid search of 5-fold validation to test  
65 different number of hidden units such as 10, 50, 100, 500 and 1000. The best median and highest  
66 number of correct predictions by DIRECT is obtained by choosing 100 hidden units in RBM.  
67 RBM with a small number of hidden units of 10 may not be sufficient to cover the entire data  
68 space. The under-fitting in the training due to the small number of hidden units leads to some  
69 poor predictions in testing. On the other hand, overfitting by RBM with such large number of  
70 hidden units as 500 or 1000 leads to little or no improvement over traditional DCA. We thus  
71 choose 100 as the optimal number of hidden units for our RBM.

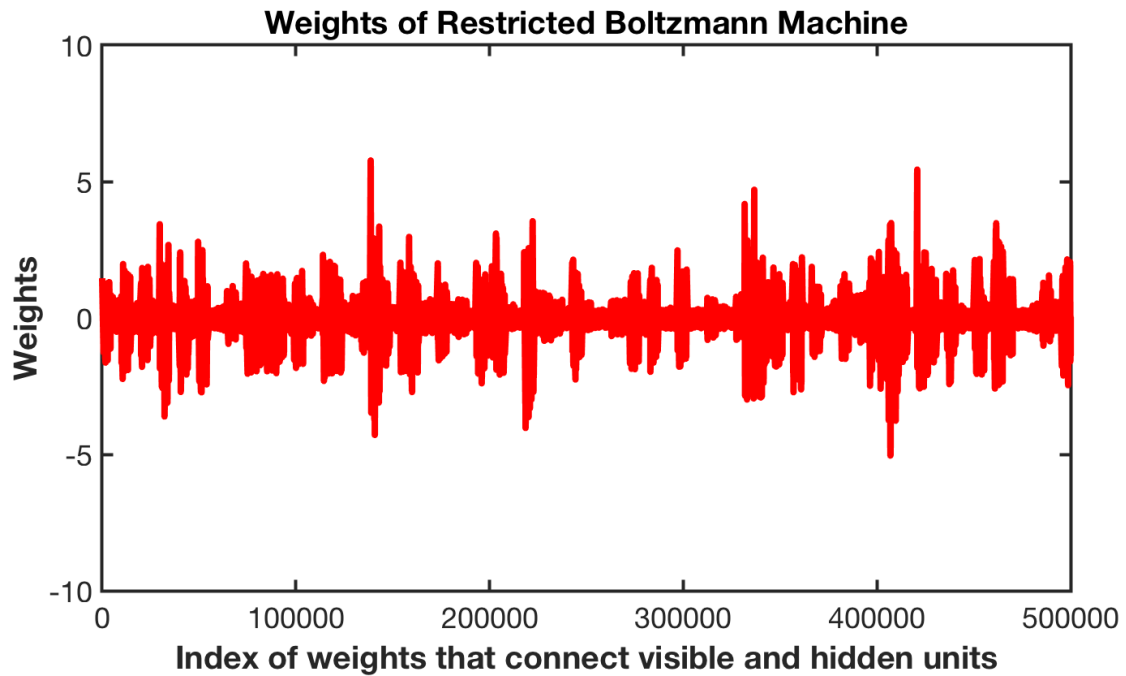

72

73 Figure S7: The weights of Restricted Boltzmann Machine. Though we do not implement the  
74 regularization term in training the weights that connect visible and hidden units, the final weights  
75 obtained nonetheless do not show extreme values associated with overfitting.

76

77



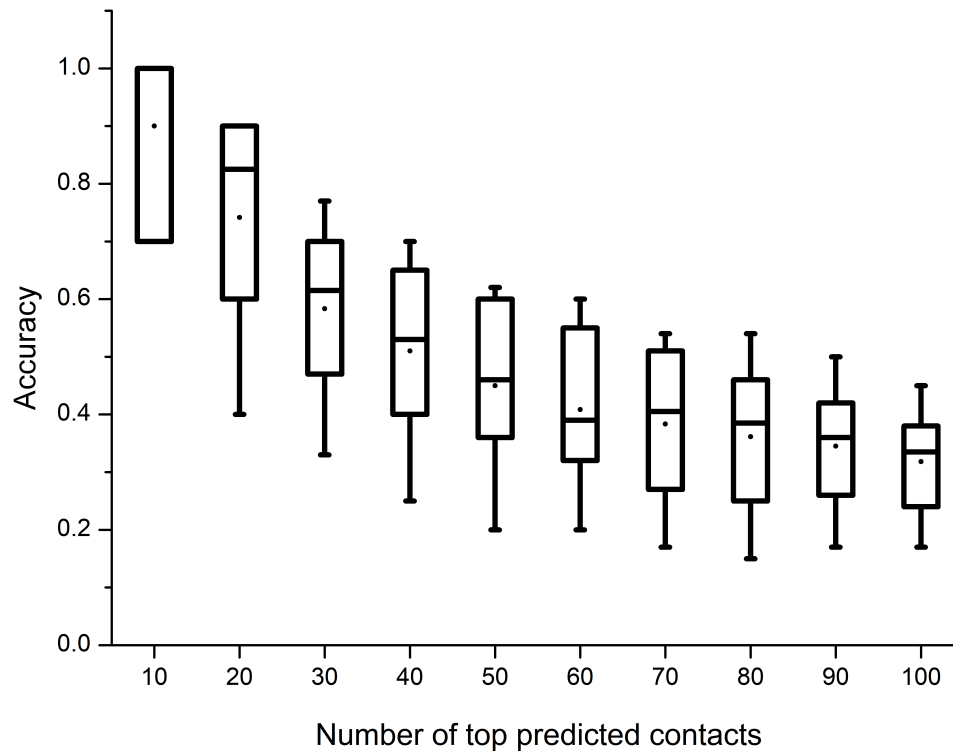

78  
79 Figure S8: The contact prediction accuracy of DIRECT. DIRECT is able to successfully identify  
80 the RNA contact with an average PPV around 0.6 in top 30 predicted contacts.

81  
82  
83  
84  
85  
86  
87  
88  
89  
90  
91  
92  
93  
94  
95  
96  
97  
98

99 Table S1: Selected riboswitches in the testing set.  
 100

| PDB  | Riboswitch type | Method | Resolution (Å) | Chain | Length | Rfam    |
|------|-----------------|--------|----------------|-------|--------|---------|
| 1Y26 | Adenine         | X-RAY  | 2.10           | X     | 63     | RF00167 |
| 2GDI | TPP             | X-RAY  | 2.05           | X     | 75     | RF00059 |
| 2GIS | SAM-I           | X-RAY  | 2.90           | A     | 94     | RF00162 |
| 3IRW | c-di-GMP        | X-RAY  | 2.70           | R     | 90     | RF01051 |
| 3OWI | Glycine         | X-RAY  | 2.85           | A     | 86     | RF00504 |
| 3VRS | Fluoride        | X-RAY  | 2.60           | A     | 52     | RF01734 |

101 The columns are PDB ID, riboswitch type, experimental method, structural resolution, selected  
 102 chain, sequence length, and Rfam ID, respectively.

103  
 104 Table S2: Number of correctly predicted contacts among the top 100 predictions further grouped  
 105 into three categories according to their base-pair (bp) separation in sequence for short (5~12bps),  
 106 medium (13~24bps), and long (>24bps) ranges, respectively.

| PDB  | Ranges | mfDCA | DIRECT <sup>1</sup> | plmDCA | DIRECT <sup>2</sup> |
|------|--------|-------|---------------------|--------|---------------------|
| 1Y26 | 5~12   | 10    | 11                  | 10     | 12                  |
|      | 13~24  | 12    | 15                  | 11     | 13                  |
|      | 24+    | 8     | 9                   | 8      | 10                  |
| 2GDI | 5~12   | 10    | 13                  | 13     | 11                  |
|      | 13~24  | 6     | 5                   | 12     | 11                  |
|      | 24+    | 18    | 21                  | 21     | 19                  |
| 2GIS | 5~12   | 10    | 11                  | 10     | 11                  |
|      | 13~24  | 8     | 9                   | 7      | 8                   |
|      | 24+    | 15    | 20                  | 16     | 23                  |
| 3OWI | 5~12   | 4     | 3                   | 5      | 3                   |
|      | 13~24  | 5     | 1                   | 3      | 1                   |
|      | 24+    | 11    | 17                  | 12     | 24                  |
| 3IRW | 5~12   | 6     | 7                   | 6      | 7                   |
|      | 13~24  | 6     | 6                   | 7      | 7                   |
|      | 24+    | 21    | 25                  | 22     | 23                  |
| 3VRS | 5~12   | 8     | 9                   | 9      | 9                   |
|      | 13~24  | 1     | 1                   | 2      | 1                   |
|      | 24+    | 7     | 6                   | 13     | 11                  |

108 Results obtained from different methods, mfDCA, DIRECT<sup>1</sup>(mfDCA+RBM), plmDCA and  
 109 DIRECT<sup>2</sup>(plmDCA+RBM) are provided for comparison.

110  
 111 Table S3: Number of correctly predicted contacts among top 100 predictions for different classes  
 112 of RNA.

| PDB  | Interactions     | mfDCA | DIRECT <sup>1</sup> | plmDCA | DIRECT <sup>2</sup> |
|------|------------------|-------|---------------------|--------|---------------------|
| 1Y26 | Base pairs       | 15    | 15                  | 15     | 15                  |
|      | stem-loop        | 5     | 5                   | 5      | 6                   |
|      | loop-loop        | 2     | 2                   | 3      | 7                   |
|      | stem-stem(intra) | 6     | 10                  | 5      | 6                   |
|      | stem-stem(inter) | 2     | 3                   | 1      | 1                   |
| 2GDI | Base pairs       | 12    | 12                  | 12     | 12                  |
|      | stem-loop        | 12    | 15                  | 17     | 15                  |
|      | loop-loop        | 6     | 8                   | 10     | 7                   |
|      | stem-stem(intra) | 3     | 3                   | 6      | 5                   |

|      |                  |    |    |    |    |
|------|------------------|----|----|----|----|
|      | stem-stem(inter) | 1  | 1  | 1  | 2  |
| 2GIS | Base pairs       | 21 | 21 | 21 | 20 |
|      | stem-loop        | 1  | 4  | 3  | 5  |
|      | loop-loop        | 9  | 5  | 8  | 5  |
|      | stem-stem(intra) | 2  | 9  | 1  | 9  |
|      | stem-stem(inter) | 0  | 1  | 0  | 3  |
| 3OWI | Base pairs       | 13 | 10 | 13 | 11 |
|      | stem-loop        | 3  | 1  | 2  | 3  |
|      | loop-loop        | 1  | 3  | 2  | 4  |
|      | stem-stem(intra) | 3  | 6  | 3  | 10 |
|      | stem-stem(inter) | 0  | 1  | 0  | 0  |
| 3IRW | Base pairs       | 16 | 16 | 17 | 17 |
|      | stem-loop        | 6  | 7  | 6  | 5  |
|      | loop-loop        | 2  | 2  | 4  | 3  |
|      | stem-stem(intra) | 8  | 12 | 8  | 11 |
|      | stem-stem(inter) | 1  | 1  | 0  | 1  |
| 3VRS | Base pairs       | 6  | 6  | 7  | 6  |
|      | stem-loop        | 1  | 1  | 5  | 4  |
|      | loop-loop        | 7  | 7  | 10 | 9  |
|      | stem-stem(intra) | 2  | 2  | 2  | 2  |
|      | stem-stem(inter) | 0  | 0  | 0  | 0  |

113 Results obtained from different methods, mfDCA, DIRECT<sup>1</sup>(mfDCA+RBM), plmDCA and  
114 DIRECT<sup>2</sup>(plmDCA+RBM) are provided for comparison.

115  
116 Table S4: Comparison for the number of correctly predicted contacts among the top 100  
117 predictions of DCA and DIRECT in a simulated dataset by randomly selecting only 50  
118 sequences.

119

| PDB  | DCA | DIRECT |
|------|-----|--------|
| 1Y26 | 27  | 33     |
| 2GDI | 27  | 29     |
| 2GIS | 22  | 23     |
| 3OWI | 20  | 21     |
| 3IRW | 22  | 29     |
| 3VRS | 19  | 18     |

120 This examines the model performance when available sequences are insufficient.

121

122 Table S5: Selected riboswitches in the training set.

123

| PDB  | Method | Resolution (Å) | Chain | Length |
|------|--------|----------------|-------|--------|
| 2CKY | X-RAY  | 2.90           | A     | 77     |
| 2MIY | NMR    |                | A     | 59     |
| 3DJ2 | X-RAY  | 2.50           | A     | 174    |
| 3F2Q | X-RAY  | 2.95           | X     | 112    |
| 3IQR | X-RAY  | 2.55           | A     | 94     |
| 3MXH | X-RAY  | 2.30           | R     | 92     |
| 3OWW | X-RAY  | 2.80           | A     | 88     |
| 4EN5 | X-RAY  | 2.96           | A     | 52     |
| 4GMA | X-RAY  | 3.94           | Z     | 210    |
| 5C7U | X-RAY  | 3.05           | B     | 67     |

124 The columns are PDB ID, experimental method, structural resolution, selected chain, and  
125 sequence length, respectively.

126  
127  
128  
129

Table S6: The sequence diversity (highlight in blue) and RMSD (highlight in green) values between each RNAs in the training set.

| PDB  | 2cky  | 2miy  | 3dj2  | 3f2q  | 3iqr  | 3mxh  | 3oww  | 4en5  | 4gma  | 5c7u  |
|------|-------|-------|-------|-------|-------|-------|-------|-------|-------|-------|
| 2cky |       | 18.18 | 22.78 | 19.04 | 22.36 | 23.59 | 23.28 | 17.97 | 26.71 | 14.04 |
| 2miy | 27.12 |       | 23.35 | 19.45 | 18.51 | 24.32 | 24.89 | 18.68 | 25.82 | 19.53 |
| 3dj2 | 27.27 | 28.81 |       | 32.91 | 29.17 | 28.35 | 35.68 | 25.14 | 29.85 | 26.56 |
| 3f2q | 25.97 | 28.81 | 27.68 |       | 22.50 | 26.08 | 26.71 | 20.22 | 26.06 | 22.54 |
| 3iqr | 29.87 | 32.20 | 27.66 | 31.91 |       | 24.17 | 22.73 | 12.80 | 27.30 | 18.60 |
| 3mxh | 20.78 | 25.42 | 32.61 | 18.48 | 27.17 |       | 25.03 | 22.44 | 28.33 | 20.74 |
| 3oww | 23.38 | 22.03 | 29.55 | 27.27 | 25.00 | 22.73 |       | 25.63 | 27.40 | 26.91 |
| 4en5 | 28.85 | 21.15 | 38.46 | 26.92 | 34.62 | 30.77 | 28.85 |       | 24.36 | 17.41 |
| 4gma | 29.87 | 30.51 | 24.14 | 25.00 | 30.85 | 32.61 | 26.14 | 42.31 |       | 25.54 |
| 5c7u | 20.90 | 22.03 | 31.34 | 28.36 | 28.36 | 32.84 | 25.37 | 26.92 | 23.88 |       |

130 The large sequence diversity and RMSD values suggest that the RNAs in the training set share  
131 little similarity.

132

133 Table S7: The RMSD values and contact information for predicted RNA tertiary structures.

134

| PDB  | Method      | RMSD(Å) | Contact |
|------|-------------|---------|---------|
| 1y26 | 3dRNA       | 6.39    | 25-50   |
| 1y26 | 3dRNA       | 5.83    | 25-50   |
| 1y26 | 3dRNA       | 7.04    | 25-50   |
| 1y26 | 3dRNA       | 8.61    | no      |
| 1y26 | 3dRNA       | 5.49    | 25-50   |
| 1y26 | RNAcomposer | 27.32   | no      |
| 1y26 | simRNA      | 9.90    | no      |
| 1y26 | simRNA      | 9.22    | no      |
| 1y26 | simRNA      | 8.48    | 25-50   |
| 1y26 | simRNA      | 15.08   | no      |
| 1y26 | simRNA      | 20.03   | no      |
| 1y26 | Vfold3D     | 7.08    | 25-50   |
| 2gdi | 3dRNA       | 21.85   | no      |
| 2gdi | 3dRNA       | 16.77   | no      |
| 2gdi | 3dRNA       | 22.67   | no      |
| 2gdi | 3dRNA       | 20.65   | no      |
| 2gdi | 3dRNA       | 8.56    | 8-60    |
| 2gdi | RNAcomposer | 9.30    | no      |
| 2gdi | simRNA      | 24.06   | no      |
| 2gdi | simRNA      | 20.31   | no      |

|      |             |       |       |
|------|-------------|-------|-------|
| 2gdi | simRNA      | 27.35 | no    |
| 2gdi | simRNA      | 21.35 | no    |
| 2gdi | simRNA      | 21.28 | no    |
| 2gis | 3dRNA       | 4.04  | 15-42 |
| 2gis | 3dRNA       | 4.03  | 15-42 |
| 2gis | 3dRNA       | 5.33  | 15-42 |
| 2gis | 3dRNA       | 5.70  | 15-42 |
| 2gis | 3dRNA       | 9.87  | 15-42 |
| 2gis | RNAcomposer | 4.33  | 15-42 |
| 2gis | simRNA      | 22.20 | no    |
| 2gis | simRNA      | 16.98 | 15-42 |
| 2gis | simRNA      | 21.35 | no    |
| 2gis | simRNA      | 16.72 | 15-42 |
| 2gis | simRNA      | 17.93 | 15-42 |
| 3irw | 3dRNA       | 9.10  | 7-89  |
| 3irw | 3dRNA       | 4.22  | 7-89  |
| 3irw | 3dRNA       | 6.05  | 7-89  |
| 3irw | 3dRNA       | 5.20  | 7-89  |
| 3irw | 3dRNA       | 9.89  | 7-89  |
| 3irw | RNAcomposer | 5.70  | 7-89  |
| 3irw | simRNA      | 20.72 | no    |
| 3irw | simRNA      | 21.69 | no    |
| 3irw | simRNA      | 21.57 | no    |
| 3irw | simRNA      | 20.44 | no    |
| 3irw | simRNA      | 23.21 | no    |
| 3irw | Vfold3D     | 1.89  | 7-89  |
| 3owi | 3dRNA       | 2.63  | 13-73 |
| 3owi | 3dRNA       | 5.21  | 13-73 |
| 3owi | 3dRNA       | 6.08  | 13-73 |
| 3owi | 3dRNA       | 6.08  | 13-73 |
| 3owi | 3dRNA       | 9.64  | 13-73 |
| 3owi | RNAcomposer | 6.42  | 13-73 |
| 3owi | simRNA      | 13.88 | no    |
| 3owi | simRNA      | 17.40 | no    |
| 3owi | simRNA      | 12.93 | no    |
| 3owi | simRNA      | 17.18 | no    |
| 3owi | simRNA      | 13.47 | no    |
| 3owi | Vfold3D     | 3.97  | 13-73 |
| 3vrs | 3dRNA       | 14.93 | no    |
| 3vrs | 3dRNA       | 15.61 | 16-22 |

|      |             |       |       |
|------|-------------|-------|-------|
| 3vrs | 3dRNA       | 13.77 | no    |
| 3vrs | 3dRNA       | 16.02 | no    |
| 3vrs | 3dRNA       | 16.38 | no    |
| 3vrs | RNAcomposer | 13.20 | 16-22 |
| 3vrs | simRNA      | 16.83 | no    |
| 3vrs | simRNA      | 10.36 | 16-22 |
| 3vrs | simRNA      | 16.86 | no    |
| 3vrs | simRNA      | 12.26 | 16-22 |
| 3vrs | simRNA      | 12.76 | no    |
| 3vrs | Vfold3D     | 15.17 | no    |

135  
136  
137

**Table S8. The non-redundant RNAs in the training set extracted from RNA 3D Hub.**

| #  | Equivalence class | Representative  | Resolution | Nts | Class members                                                                                                                                                                |
|----|-------------------|-----------------|------------|-----|------------------------------------------------------------------------------------------------------------------------------------------------------------------------------|
| 1  | NR_3.0_51824.1    | 5WTI 1 B (5WTI) | 2.7 Å      | 115 | (1) 5WTI 1 B                                                                                                                                                                 |
| 2  | NR_3.0_53735.1    | 4QLM 1 A (4QLM) | 2.7 Å      | 108 | (2) 4QLM 1 A,<br>4QLN 1 A                                                                                                                                                    |
| 3  | NR_3.0_47203.1    | 3F2Q 1 X (3F2Q) | 3.0 Å      | 107 | (2) 3F2Q 1 X,<br>3F2T 1 X                                                                                                                                                    |
| 4  | NR_3.0_83641.1    | 4Y1M 1 B (4Y1M) | 3.0 Å      | 107 | (2) 4Y1M 1 B,<br>4Y1M 1 A                                                                                                                                                    |
| 5  | NR_3.0_27096.1    | 4WFL 1 A (4WFL) | 2.5 Å      | 105 | (1) 4WFL 1 A                                                                                                                                                                 |
| 6  | NR_3.0_00143.1    | 4Y1J 1 A (4Y1J) | 2.2 Å      | 100 | (4) 4Y1J 1 A,<br>4Y1J 1 B,<br>4Y1I 1 A,<br>4Y1I 1 B                                                                                                                          |
| 7  | NR_3.0_20814.1    | 3SUX 1 X (3SUX) | 2.9 Å      | 100 | (2) 3SUX 1 X,<br>3SUH 1 X                                                                                                                                                    |
| 8  | NR_3.0_50424.1    | 5U30 1 B (5U30) | 2.9 Å      | 99  | (2) 5U30 1 B,<br>5U31 1 B                                                                                                                                                    |
| 9  | NR_3.0_37714.1    | 4RZD 1 A (4RZD) | 2.8 Å      | 98  | (1) 4RZD 1 A                                                                                                                                                                 |
| 10 | NR_3.0_12869.1    | 4L81 1 A (4L81) | 3.0 Å      | 96  | (1) 4L81 1 A<br>(12) 5FJC 1 A,<br>5FK4 1 A,<br>4B5R 1 A,<br>5FK3 1 A,<br>5FK2 1 A,<br>5FKF 1 A,<br>5FK6 1 A,<br>5FK1 1 A,<br>5FKD 1 A,<br>5FKH 1 A,<br>5FKG 1 A,<br>5FKE 1 A |
| 11 | NR_3.0_31222.1    | 5FJC 1 A (5FJC) | 1.7 Å      | 96  | (2) 4AOB 1 A,<br>4AEB 1 A                                                                                                                                                    |
| 12 | NR_3.0_77464.1    | 4AOB 1 A (4AOB) | 3.0 Å      | 94  |                                                                                                                                                                              |

|    |                |                 |       |    |                                                                                                                                                 |
|----|----------------|-----------------|-------|----|-------------------------------------------------------------------------------------------------------------------------------------------------|
| 13 | NR_3.0_82809.4 | 2YGH 1 A (2YGH) | 2.6 Å | 94 | (11) 2YGH 1 A,<br>3GX5 1 A,<br>3GX3 1 A,<br>3IQR 1 A,<br>3IQP 1 A,<br>3GX7 1 A,<br>3IQN 1 A,<br>2GIS 1 A,<br>2YDH 1 A,<br>3GX2 1 A,<br>3GX6 1 A |
| 14 | NR_3.0_60079.1 | 5X2G 1 B (5X2G) | 2.4 Å | 93 | (2) 5X2G 1 B,<br>5X2H 1 B                                                                                                                       |
| 15 | NR_3.0_90160.4 | 5B2P 1 B (5B2P) | 1.7 Å | 93 | (3) 5B2P 1 B,<br>5B2O 1 B,<br>5B2Q 1 B                                                                                                          |
| 16 | NR_3.0_88154.1 | 4RUM 1 A (4RUM) | 2.6 Å | 92 | (1) 4RUM 1 A<br>(9) 3MXH 1 R,<br>3MUM 1 R,<br>3UCZ 1 R,<br>4YB1 1 R,                                                                            |
| 17 | NR_3.0_12260.3 | 3MXH 1 R (3MXH) | 2.3 Å | 91 | 3MUR 1 R,<br>3UD4 1 R,<br>3MUT 1 R,<br>3IRW 1 R,<br>3UCU 1 R                                                                                    |
| 18 | NR_3.0_49553.1 | 3CUL 1 C (3CUL) | 2.8 Å | 91 | (4) 3CUL 1 C,<br>3CUN 1 C,<br>3CUL 1 D,<br>3CUN 1 D                                                                                             |
| 19 | NR_3.0_75326.1 | 1M5K 1 B (1M5K) | 2.4 Å | 91 | (8) 1M5K 1 B,<br>1M5K 1 E,<br>1M5O 1 B,<br>1M5P 1 B,<br>1M5O 1 E,<br>1M5V 1 B,<br>1M5P 1 E,<br>1M5V 1 E                                         |
| 20 | NR_3.0_91539.1 | 5T83 1 A (5T83) | 2.7 Å | 90 | (1) 5T83 1 A<br>(8) 4LVW 1 A,<br>4LVX 1 A,<br>4LVY 1 A,<br>4LW0 1 A,<br>4LVV 1 A,<br>4LVZ 1 A,<br>3SD3 1 A,<br>3SD1 1 A                         |
| 21 | NR_3.0_78797.2 | 4LVW 1 A (4LVW) | 1.8 Å | 89 | (6) 3ADD 1 C,<br>3ADD 1 D,<br>3ADB 1 D,                                                                                                         |
| 22 | NR_3.0_63789.1 | 3ADD 1 C (3ADD) | 2.4 Å | 88 |                                                                                                                                                 |

|    |                |                |       |    |                                                                                                                                                                          |
|----|----------------|----------------|-------|----|--------------------------------------------------------------------------------------------------------------------------------------------------------------------------|
|    |                |                |       |    | 3ADB 1C,<br>3ADC 1C,<br>3ADC 1D                                                                                                                                          |
| 23 | NR_3.0_32185.1 | 3OXE 1A (3OXE) | 2.9 Å | 86 | (14) 3OXE 1A,<br>3OXB 1A,<br>3OXB 1B,<br>3OXE 1B,<br>3OXD 1A,<br>3OXD 1B,<br>3OXM 1A,<br>3OXM 1B,<br>3OWI 1A,<br>3OWZ 1A,<br>3OWI 1B,<br>3OWW 1A,<br>3OWW 1B,<br>3OWZ 1B |
| 24 | NR_3.0_57598.2 | 3RG5 1B (3RG5) | 2.0 Å | 86 | (2) 3RG5 1B,<br>3RG5 1A                                                                                                                                                  |
| 25 | NR_3.0_59099.1 | 5AOX 1C (5AOX) | 2.0 Å | 86 | (2) 5AOX 1C,<br>5AOX 1F                                                                                                                                                  |
| 26 | NR_3.0_01779.1 | 4FRG 1B (4FRG) | 3.0 Å | 84 | (2) 4FRG 1B,<br>4FRG 1X                                                                                                                                                  |
| 27 | NR_3.0_04754.1 | 5U3G 1B (5U3G) | 2.3 Å | 84 | (1) 5U3G 1B                                                                                                                                                              |
| 28 | NR_3.0_98075.1 | 2ZZM 1B (2ZZM) | 2.7 Å | 84 | (1) 2ZZM 1B                                                                                                                                                              |
| 29 | NR_3.0_02656.1 | 4P5J 1A (4P5J) | 2.0 Å | 83 | (1) 4P5J 1A                                                                                                                                                              |
| 30 | NR_3.0_27557.1 | 4KZD 1R (4KZD) | 2.2 Å | 83 | (4) 4KZD 1R,<br>6B14 1R,<br>6B3K 1R,<br>4KZE 1R                                                                                                                          |
| 31 | NR_3.0_31480.1 | 4YAZ 1R (4YAZ) | 2.0 Å | 83 | (4) 4YAZ 1R,<br>4YAZ 1A,<br>4YB0 1R,<br>4YB0 1A                                                                                                                          |
| 32 | NR_3.0_92081.5 | 5FQ5 1A (5FQ5) | 2.1 Å | 83 | (8) 5FQ5 1A,<br>5FW2 1A,<br>5VW1 1C,<br>4UN4 1A,<br>4UN5 1A,<br>5FW3 1A,<br>4UN3 1A,<br>5FW1 1A                                                                          |
| 33 | NR_3.0_11709.1 | 3ZGZ 1B (3ZGZ) | 2.4 Å | 82 | (14) 3ZGZ 1B,<br>4AQ7 1B,<br>5OMW 1B,<br>3ZGZ 1E,<br>4AS1 1B,<br>4ARI 1B,<br>4AQ7 1E,<br>4CQN 1B,                                                                        |



|    |                |                 |       |    |  |                                                                                                                      |
|----|----------------|-----------------|-------|----|--|----------------------------------------------------------------------------------------------------------------------|
|    |                |                 |       |    |  | 3ZJT 1 B,<br>5OMW 1 E,<br>3ZJU 1 B,<br>4ARC 1 B,<br>4CQN 1 E,<br>3ZJV 1 B                                            |
| 34 | NR_3.0_09775.1 | 5AH5 1 D (5AH5) | 2.1 Å | 81 |  | (2) 5AH5 1 D,<br>5AH5 1 C                                                                                            |
| 35 | NR_3.0_13919.1 | 3AM1 1 B (3AM1) | 2.4 Å | 81 |  | (1) 3AM1 1 B                                                                                                         |
| 36 | NR_3.0_33394.2 | 5B2T 1 A (5B2T) | 2.2 Å | 81 |  | (5) 5B2T 1 A,<br>5B2R 1 A,<br>5B2S 1 A,<br>4OO8 1 B,<br>4OO8 1 E                                                     |
| 37 | NR_3.0_13221.1 | 1H3E 1 B (1H3E) | 2.9 Å | 80 |  | (1) 1H3E 1 B                                                                                                         |
| 38 | NR_3.0_73731.1 | 3U4M 1 B (3U4M) | 2.0 Å | 80 |  | (5) 3U4M 1 B,<br>4QVI 1 B,<br>3UMY 1 B,<br>4QG3 1 B,<br>3U56 1 B                                                     |
| 39 | NR_3.0_23989.1 | 2BTE 1 B (2BTE) | 2.9 Å | 78 |  | (2) 2BTE 1 B,<br>2BTE 1 E                                                                                            |
| 40 | NR_3.0_42241.1 | 2GDI 1 X (2GDI) | 2.1 Å | 78 |  | (9) 2GDI 1 X,<br>2GDI 1 Y,<br>4NYA 1 A,<br>2HOJ 1 A,<br>2HOM 1 A,<br>2HOL 1 A,<br>4NYD 1 A,<br>4NYA 1 B,<br>2HOO 1 A |
| 41 | NR_3.0_56041.1 | 3AMT 1 B (3AMT) | 2.9 Å | 78 |  | (1) 3AMT 1 B                                                                                                         |
| 42 | NR_3.0_72172.1 | 5CCB 1 N (5CCB) | 2.0 Å | 78 |  | (2) 5CCB 1 N,<br>5CCX 1 N                                                                                            |
| 43 | NR_3.0_27756.1 | 3D2V 1 A (3D2V) | 2.0 Å | 77 |  | (8) 3D2V 1 A,<br>3D2X 1 A,<br>3D2V 1 B,<br>3D2G 1 A,<br>3D2X 1 B,<br>2CKY 1 A,<br>3D2G 1 B,<br>2CKY 1 B              |
| 44 | NR_3.0_65284.1 | 2ZUE 1 B (2ZUE) | 2.0 Å | 77 |  | (2) 2ZUE 1 B,<br>2ZUF 1 B                                                                                            |
| 45 | NR_3.0_27306.1 | 4JF2 1 A (4JF2) | 2.3 Å | 76 |  | (1) 4JF2 1 A                                                                                                         |
| 46 | NR_3.0_42401.1 | 4RDX 1 C (4RDX) | 2.6 Å | 76 |  | (1) 4RDX 1 C                                                                                                         |
| 47 | NR_3.0_55964.1 | 5D5L 1 A (5D5L) | 2.5 Å | 76 |  | (4) 5D5L 1 A,<br>5D5L 1 D,<br>5D5L 1 B,<br>5D5L 1 C                                                                  |

|    |                |                 |       |    |                                                                                                                                                                                        |
|----|----------------|-----------------|-------|----|----------------------------------------------------------------------------------------------------------------------------------------------------------------------------------------|
| 48 | NR_3.0_89906.2 | 5HC9 1 D (5HC9) | 2.9 Å | 76 | (5) 5HC9 1 D,<br>4WC2 1 B,<br>5HC9 1 C,<br>1VFG 1 D,<br>1VFG 1 C                                                                                                                       |
| 49 | NR_3.0_03715.1 | 1QU2 1 T (1QU2) | 2.2 Å | 75 | (3) 1QU2 1 T,<br>1QU3 1 T,<br>1FFY 1 T                                                                                                                                                 |
| 50 | NR_3.0_10787.1 | 5X6B 1 P (5X6B) | 2.6 Å | 75 | (1) 5X6B 1 P                                                                                                                                                                           |
| 51 | NR_3.0_29085.1 | 1N78 1 C (1N78) | 2.1 Å | 75 | (14) 1N78 1 C,<br>1N78 1 D,<br>2DXI 1 C,<br>1N77 1 C,<br>2DXI 1 D,<br>2CV2 1 C,<br>1N77 1 D,<br>2CV2 1 D,<br>2CV1 1 D,<br>2CV1 1 C,<br>2CV0 1 C,<br>2CV0 1 D,<br>1G59 1 B,<br>1G59 1 D |
| 52 | NR_3.0_5269.1  | 2DR2 1 B (2DR2) | 3.0 Å | 75 | (1) 2DR2 1 B                                                                                                                                                                           |
| 53 | NR_3.0_57348.1 | 1GAX 1 D (1GAX) | 2.9 Å | 75 | (4) 1GAX 1 D,<br>1GAX 1 C,<br>1IVS 1 C,<br>1IVS 1 D                                                                                                                                    |
| 54 | NR_3.0_58761.1 | 2CSX 1 C (2CSX) | 2.7 Å | 75 | (4) 2CSX 1 C,<br>2CT8 1 D,<br>2CT8 1 C,<br>2CSX 1 D                                                                                                                                    |
| 55 | NR_3.0_73165.2 | 4PRF 1 B (4PRF) | 2.4 Å | 75 | (14) 4PRF 1 B,<br>2OJ3 1 B,<br>1SJF 1 B,<br>1VC0 1 B,<br>1VC6 1 B,<br>1VBZ 1 B,<br>1SJ4 1 R,<br>1SJ3 1 R,<br>2OIH 1 B,<br>1VBY 1 B,<br>1VBX 1 B,<br>1CX0 1 B,<br>1DRZ 1 B,<br>1VC7 1 B |
| 56 | NR_3.0_04935.1 | 3AKZ 1 E (3AKZ) | 2.9 Å | 74 | (6) 3AKZ 1 E,<br>3AKZ 1 F,<br>3AKZ 1 H,<br>3AKZ 1 G,                                                                                                                                   |

|    |                 |                |       |    |                                                                                                                                                                                                                                                                                                                                                                                                                                                                                                                                                                                                                                          |
|----|-----------------|----------------|-------|----|------------------------------------------------------------------------------------------------------------------------------------------------------------------------------------------------------------------------------------------------------------------------------------------------------------------------------------------------------------------------------------------------------------------------------------------------------------------------------------------------------------------------------------------------------------------------------------------------------------------------------------------|
|    |                 |                |       |    | 4YVJ 1C,<br>4YVK 1C                                                                                                                                                                                                                                                                                                                                                                                                                                                                                                                                                                                                                      |
| 57 | NR_3.0_09431.1  | 4PR6 1B (4PR6) | 2.3 Å | 74 | (1) 4PR6 1B                                                                                                                                                                                                                                                                                                                                                                                                                                                                                                                                                                                                                              |
|    |                 |                |       |    | (108) 4YCO 1D,<br>4YCO 1F,<br>4YCO 1E,<br>3FOZ 1C,<br>4WOI 1DW,<br>5NDK 1X1,<br>4V9H 1AV,<br>3L0U 1A,<br>2ZM5 1C,<br>5NDK 1X4,<br>4V9D 1BV,<br>2ZXU 1C,<br>3FOZ 1D,<br>4WQU 1BW,<br>4W2E 1w,<br>4WQF 1BW,<br>5J4B 11y,<br>6CFJ 11w,<br>5W4K 11y,<br>5WIT 11w,<br>6CFJ 11y,<br>6CFJ 12w,<br>5J4C 11w,<br>5WIS 11y,<br>5J4C 11y,<br>4WQU 1DW,<br>5NDK 1W1,<br>6CFJ 12y,<br>5WIS 11w,<br>4V51 1AW,<br>5J4B 11w,<br>4WQF 1DW,<br>5J4C 12w,<br>5J4B 12w,<br>5NDK 1W4,<br>5J4B 12y,<br>4WOI 1AX,<br>5W4K 11w,<br>5J4C 12y,<br>4W2G 1AW,<br>5WIS 12y,<br>5WIT 12w,<br>4V9D 1AV,<br>5DOY 11y,<br>2ZM5 1D,<br>5W4K 12y,<br>4Y4P 11y,<br>4WSD 11K, |
| 58 | NR_3.0_19951.22 | 4YCO 1D (4YCO) | 2.1 Å | 74 |                                                                                                                                                                                                                                                                                                                                                                                                                                                                                                                                                                                                                                          |

4Z3S|1|1y,  
5DOY|1|1w,  
4V51|1|CW,  
5DOY|1|2y,  
4WSD|1|3L,  
4W2I|1|AW,  
4Z3S|1|1w,  
4Z3S|1|2y,  
4W2I|1|CW,  
5W4K|1|2w,  
1VY4|1|AW,  
4WPO|1|BY,  
4Y4P|1|2y,  
4WSD|1|3K,  
4W2G|1|CW,  
4W2I|1|AY,  
4W2F|1|AW,  
4Y4P|1|1w,  
4Z3S|1|2w,  
4W2I|1|CY,  
1VY4|1|AY,  
4W2G|1|AY,  
4WPO|1|DY,  
5WIS|1|2w,  
2ZXU|1|D,  
5NDK|1|V4,  
4W2G|1|CY,  
5WIT|1|1y,  
4W2F|1|AY,  
4Y4P|1|2w,  
5DOY|1|2w,  
1VY5|1|AW,  
1VY4|1|CY,  
4WSD|1|1L,  
5WIT|1|2y,  
5NDK|1|V1,  
4W2F|1|CW,  
4W2F|1|CY,  
4WPO|1|BW,  
1VY7|1|AY,  
1VY5|1|AY,  
1VY4|1|CW,  
1VY7|1|CY,  
1VY5|1|CW,  
1VY5|1|CY,  
4WPO|1|DW,  
4W2H|1|AY,  
4WQU|1|BY,  
4W2H|1|CY,  
4W2E|1|x,  
4WQU|1|DY,

|    |                |                 |       |    |                                                                                                                                                                                                                                                                          |
|----|----------------|-----------------|-------|----|--------------------------------------------------------------------------------------------------------------------------------------------------------------------------------------------------------------------------------------------------------------------------|
|    |                |                 |       |    | 4WQF 1 BY,<br>4WQF 1 DY,<br>6AZ1 1 4,<br>6AZ1 1 2,<br>3R8O 1 V,<br>3R8N 1 V,<br>5AFI 1 y,<br>5IQR 1 4,<br>5IQR 1 6                                                                                                                                                       |
| 59 | NR_3.0_31819.2 | 1QTQ 1 B (1QTQ) | 2.3 Å | 74 | (20) 1QTQ 1 B,<br>4JXX 1 B,<br>1ZJW 1 B,<br>4V7L 1 AW,<br>4V7L 1 CW,<br>1EUY 1 B,<br>4V7L 1 AY,<br>4V7L 1 CY,<br>1QRS 1 B,<br>1QRT 1 B,<br>1QRU 1 B,<br>1GTR 1 B,<br>2RD2 1 B,<br>1GTS 1 B,<br>5NWY 1 M,<br>2RE8 1 B,<br>1GSG 1 T,<br>1O0C 1 B,<br>1O0B 1 B,<br>1EXD 1 B |
| 60 | NR_3.0_39569.1 | 4YYE 1 C (4YYE) | 2.3 Å | 74 | (2) 4YYE 1 C,<br>4YYE 1 D                                                                                                                                                                                                                                                |
| 61 | NR_3.0_65073.1 | 3Q3Z 1 V (3Q3Z) | 2.5 Å | 74 | (2) 3Q3Z 1 V,<br>3Q3Z 1 A                                                                                                                                                                                                                                                |
| 62 | NR_3.0_70420.1 | 1J1U 1 B (1J1U) | 2.0 Å | 74 | (1) 1J1U 1 B                                                                                                                                                                                                                                                             |
| 63 | NR_3.0_83386.1 | 1U0B 1 A (1U0B) | 2.3 Å | 74 | (1) 1U0B 1 A                                                                                                                                                                                                                                                             |
| 64 | NR_3.0_98593.1 | 5D8H 1 A (5D8H) | 2.8 Å | 74 | (1) 5D8H 1 A                                                                                                                                                                                                                                                             |
| 65 | NR_3.0_06496.1 | 5E6M 1 C (5E6M) | 2.9 Å | 73 | (2) 5E6M 1 C,<br>5E6M 1 E                                                                                                                                                                                                                                                |
| 66 | NR_3.0_45659.1 | 4ZNP 1 A (4ZNP) | 2.9 Å | 73 | (2) 4ZNP 1 A,<br>4ZNP 1 B                                                                                                                                                                                                                                                |
| 67 | NR_3.0_96162.1 | 5CZZ 1 B (5CZZ) | 2.6 Å | 73 | (2) 5CZZ 1 B,<br>5AXW 1 B                                                                                                                                                                                                                                                |
| 68 | NR_3.0_30153.3 | 5AXM 1 P (5AXM) | 2.2 Å | 72 | (10) 5AXM 1 P,<br>5AXN 1 P,<br>4TNA 1 A,<br>1EHZ 1 A,<br>1I9V 1 A,<br>1TN1 1 A,<br>1TN2 1 A,<br>4TRA 1 A,                                                                                                                                                                |

|    |                 |                 |       |    |                                                                                                                                                                                                                                                                                                                                                                                                                                                                                                                                                                                  |
|----|-----------------|-----------------|-------|----|----------------------------------------------------------------------------------------------------------------------------------------------------------------------------------------------------------------------------------------------------------------------------------------------------------------------------------------------------------------------------------------------------------------------------------------------------------------------------------------------------------------------------------------------------------------------------------|
|    |                 |                 |       |    | 6TNA 1 A,<br>1TRA 1 A                                                                                                                                                                                                                                                                                                                                                                                                                                                                                                                                                            |
| 69 | NR_3.0_65123.1  | 4ZT0 1 D (4ZT0) | 2.9 Å | 72 | (2) 4ZT0 1 D,<br>4ZT0 1 B                                                                                                                                                                                                                                                                                                                                                                                                                                                                                                                                                        |
| 70 | NR_3.0_98033.1  | 2AZX 1 D (2AZX) | 2.8 Å | 72 | (2) 2AZX 1 D,<br>2AZX 1 C                                                                                                                                                                                                                                                                                                                                                                                                                                                                                                                                                        |
| 71 | NR_3.0_01439.1  | 5TPY 1 A (5TPY) | 2.8 Å | 71 | (1) 5TPY 1 A                                                                                                                                                                                                                                                                                                                                                                                                                                                                                                                                                                     |
| 72 | NR_3.0_28348.1  | 4JXZ 1 B (4JXZ) | 2.4 Å | 71 | (2) 4JXZ 1 B,<br>4JYZ 1 B                                                                                                                                                                                                                                                                                                                                                                                                                                                                                                                                                        |
| 73 | NR_3.0_33389.1  | 2DU3 1 D (2DU3) | 2.6 Å | 71 | (2) 2DU3 1 D,<br>2DU4 1 C                                                                                                                                                                                                                                                                                                                                                                                                                                                                                                                                                        |
|    |                 |                 |       |    | (83) 5L4O 1 A,<br>5HCQ 1 1x,<br>5IBB 1 2K,<br>5HCQ 1 2x,<br>5IB7 1 2K,<br>4V8D 1 CC,<br>5HCR 1 1x,<br>4Z8C 1 1x,<br>5J4B 1 1x,<br>4WSD 1 2L,<br>4V8D 1 AC,<br>5IBB 1 2L,<br>5J4B 1 2x,<br>4Z8C 1 2x,<br>4WSD 1 2K,<br>5J4C 1 1x,<br>4WPO 1 BX,<br>5W4K 1 1x,<br>1VY4 1 AX,<br>4W2H 1 AX,<br>5HCR 1 2x,<br>4LNT 1 XV,<br>5HD1 1 1x,<br>5HCP 1 1x,<br>5HAU 1 1w,<br>5J4C 1 2x,<br>4W2I 1 AX,<br>5WIS 1 1x,<br>5IB7 1 2L,<br>4W2G 1 CX,<br>4LNT 1 QV,<br>4W2H 1 CX,<br>5W4K 1 2x,<br>5HAU 1 2w,<br>4Y4P 1 1x,<br>4W2G 1 AX,<br>5HCP 1 2x,<br>5DOY 1 1x,<br>5WIT 1 1x,<br>5HD1 1 2x, |
| 74 | NR_3.0_35542.43 | 5L4O 1 A (5L4O) | 2.8 Å | 71 |                                                                                                                                                                                                                                                                                                                                                                                                                                                                                                                                                                                  |

|    |                |                 |       |    |                                                                                                                                                                                                                                                                                                                                                                                                                                                                                                                                                                                                               |
|----|----------------|-----------------|-------|----|---------------------------------------------------------------------------------------------------------------------------------------------------------------------------------------------------------------------------------------------------------------------------------------------------------------------------------------------------------------------------------------------------------------------------------------------------------------------------------------------------------------------------------------------------------------------------------------------------------------|
|    |                |                 |       |    | 4W2I 1 CX,<br>1VY7 1 AX,<br>4Z3S 1 1x,<br>1VY4 1 CX,<br>4W2F 1 AX,<br>1VY5 1 AX,<br>4V51 1 CV,<br>4WPO 1 DX,<br>4V9R 1 AX,<br>4V9R 1 CX,<br>4W2F 1 CX,<br>5WIS 1 2x,<br>4V51 1 AV,<br>4Y4P 1 2x,<br>1VY6 1 AX,<br>4Z3S 1 2x,<br>1VY6 1 CX,<br>4WQY 1 BX,<br>5DOY 1 2x,<br>5WIT 1 2x,<br>5F8K 1 1x,<br>1VY5 1 CX,<br>4V8B 1 AC,<br>4V67 1 AY,<br>4V7L 1 CX,<br>4V8B 1 CC,<br>4V7L 1 AX,<br>5F8K 1 2x,<br>4V67 1 CY,<br>4WQY 1 DX,<br>1VY7 1 CX,<br>4V8B 1 AD,<br>4V8B 1 CD,<br>4V67 1 AZ,<br>4V67 1 CZ,<br>6AZ1 1 3,<br>5AFI 1 v,<br>5AFI 1 w,<br>5MDV 1 5,<br>2FMT 1 D,<br>2FMT 1 C,<br>5IQR 1 5,<br>4BTC 1 V |
| 75 | NR_3.0_36247.1 | 2OIU 1 Q (2OIU) | 2.6 Å | 71 | (1) 2OIU 1 Q<br>(5) 4XNR 1 X,<br>4TZY 1 X,<br>4TZX 1 X,<br>5UZA 1 X,<br>5SWE 1 X                                                                                                                                                                                                                                                                                                                                                                                                                                                                                                                              |
| 76 | NR_3.0_59689.4 | 4XNR 1 X (4XNR) | 2.2 Å | 71 |                                                                                                                                                                                                                                                                                                                                                                                                                                                                                                                                                                                                               |
| 77 | NR_3.0_60142.1 | 2OIU 1 P (2OIU) | 2.6 Å | 71 | (1) 2OIU 1 P                                                                                                                                                                                                                                                                                                                                                                                                                                                                                                                                                                                                  |

|     |                |                 |       |    |                                                                                                                      |
|-----|----------------|-----------------|-------|----|----------------------------------------------------------------------------------------------------------------------|
| 78  | NR_3.0_63265.1 | 3LA5 1 A (3LA5) | 1.7 Å | 71 | (1) 3LA5 1 A                                                                                                         |
| 79  | NR_3.0_69516.1 | 1Y26 1 X (1Y26) | 2.1 Å | 71 | (1) 1Y26 1 X                                                                                                         |
| 80  | NR_3.0_73445.1 | 4LX6 1 A (4LX6) | 2.2 Å | 71 | (2) 4LX6 1 A,<br>4LX5 1 A                                                                                            |
| 81  | NR_3.0_74174.1 | 5KPY 1 A (5KPY) | 2.0 Å | 71 | (1) 5KPY 1 A                                                                                                         |
| 82  | NR_3.0_79254.1 | 3KFU 1 L (3KFU) | 3.0 Å | 71 | (4) 3KFU 1 L,<br>3KFU 1 K,<br>3KFU 1 N,<br>3KFU 1 M                                                                  |
| 83  | NR_3.0_90969.1 | 2ZZN 1 D (2ZZN) | 3.0 Å | 71 | (2) 2ZZN 1 D,<br>2ZZN 1 C                                                                                            |
| 84  | NR_3.0_26998.1 | 1KXK 1 A (1KXK) | 3.0 Å | 70 | (1) 1KXK 1 A                                                                                                         |
| 85  | NR_3.0_42502.1 | 5HR7 1 D (5HR7) | 2.4 Å | 70 | (2) 5HR7 1 D,<br>5HR7 1 C                                                                                            |
| 86  | NR_3.0_93427.1 | 5UD5 1 C (5UD5) | 2.4 Å | 70 | (4) 5UD5 1 C,<br>5UD5 1 D,<br>5V6X 1 C,<br>5V6X 1 D                                                                  |
| 87  | NR_3.0_45040.1 | 3EPH 1 E (3EPH) | 3.0 Å | 69 | (2) 3EPH 1 E,<br>3EPH 1 F                                                                                            |
| 88  | NR_3.0_66984.1 | 3IVN 1 A (3IVN) | 2.8 Å | 69 | (2) 3IVN 1 A,<br>3IVN 1 B                                                                                            |
| 89  | NR_3.0_85174.1 | 1QF6 1 B (1QF6) | 2.9 Å | 69 | (1) 1QF6 1 B                                                                                                         |
| 90  | NR_3.0_88566.1 | 3MOJ 1 A (3MOJ) | 2.9 Å | 69 | (1) 3MOJ 1 A                                                                                                         |
| 91  | NR_3.0_92167.1 | 5OB3 1 A (5OB3) | 2.0 Å | 69 | (1) 5OB3 1 A                                                                                                         |
| 92  | NR_3.0_03710.1 | 1C0A 1 B (1C0A) | 2.4 Å | 68 | (3) 1C0A 1 B,<br>1EFW 1 D,<br>1EFW 1 C                                                                               |
| 93  | NR_3.0_19188.1 | 4QEI 1 C (4QEI) | 2.9 Å | 68 | (1) 4QEI 1 C                                                                                                         |
| 94  | NR_3.0_40252.1 | 2QUS 1 A (2QUS) | 2.4 Å | 68 | (2) 2QUS 1 A,<br>2QUS 1 B                                                                                            |
| 95  | NR_3.0_56345.1 | 5SWD 1 B (5SWD) | 2.5 Å | 68 | (4) 5SWD 1 B,<br>5E54 1 B,<br>5E54 1 A,<br>5SWD 1 A                                                                  |
| 96  | NR_3.0_65615.1 | 5HR6 1 C (5HR6) | 2.9 Å | 68 | (2) 5HR6 1 C,<br>5HR6 1 D                                                                                            |
| 97  | NR_3.0_70496.1 | 1Y27 1 X (1Y27) | 2.4 Å | 68 | (1) 1Y27 1 X                                                                                                         |
| 98  | NR_3.0_72021.1 | 4PQV 1 A (4PQV) | 2.5 Å | 68 | (1) 4PQV 1 A                                                                                                         |
| 99  | NR_3.0_24819.2 | 1IL2 1 C (1IL2) | 2.6 Å | 67 | (9) 1IL2 1 C,<br>1IL2 1 D,<br>2TRA 1 A,<br>3TRA 1 A,<br>1ASZ 1 S,<br>1ASY 1 S,<br>1ASZ 1 R,<br>1ASY 1 R,<br>1VTQ 1 A |
| 100 | NR_3.0_27778.1 | 5WT1 1 C (5WT1) | 2.6 Å | 67 | (2) 5WT1 1 C,                                                                                                        |



|     |                |                 |       |    |                                                                                                                                                                                                                                                                                                                                                                 |
|-----|----------------|-----------------|-------|----|-----------------------------------------------------------------------------------------------------------------------------------------------------------------------------------------------------------------------------------------------------------------------------------------------------------------------------------------------------------------|
|     |                |                 |       |    | 5WT1 1 F                                                                                                                                                                                                                                                                                                                                                        |
| 101 | NR_3.0_76114.1 | 3RKF 1 C (3RKF) | 2.5 Å | 67 | (4) 3RKF 1 C,<br>3RKF 1 B,<br>3RKF 1 A,<br>3RKF 1 D                                                                                                                                                                                                                                                                                                             |
| 102 | NR_3.0_89429.3 | 4FEN 1 B (4FEN) | 1.4 Å | 67 | (27) 4FEN 1 B,<br>4FEO 1 B,<br>4FEL 1 B,<br>4FEP 1 B,<br>4FEJ 1 B,<br>4FE5 1 B,<br>2XNZ 1 A,<br>2XNW 1 A,<br>3GOT 1 A,<br>2G9C 1 A,<br>3GAO 1 A,<br>3GER 1 A,<br>2EES 1 A,<br>3GOG 1 A,<br>3DS7 1 A,<br>2EET 1 A,<br>3FO4 1 A,<br>2EEV 1 A,<br>3DS7 1 B,<br>3FO6 1 A,<br>3G4M 1 A,<br>3GES 1 A,<br>2B57 1 A,<br>2EEW 1 A,<br>2EEU 1 A,<br>2XO1 1 A,<br>1U8D 1 A |
| 103 | NR_3.0_21705.1 | 3SKI 1 A (3SKI) | 2.3 Å | 66 | (8) 3SKI 1 A,<br>3SKI 1 B,<br>3SLM 1 B,<br>3SKZ 1 A,<br>3SLM 1 A,<br>3SLQ 1 A,<br>3SKZ 1 B,<br>3SLQ 1 B                                                                                                                                                                                                                                                         |
| 104 | NR_3.0_34221.1 | 1B23 1 R (1B23) | 2.6 Å | 66 | (1) 1B23 1 R                                                                                                                                                                                                                                                                                                                                                    |
| 105 | NR_3.0_26284.1 | 1H4S 1 T (1H4S) | 2.9 Å | 65 | (2) 1H4S 1 T,<br>1H4Q 1 T                                                                                                                                                                                                                                                                                                                                       |
| 106 | NR_3.0_30439.1 | 3EGZ 1 B (3EGZ) | 2.2 Å | 65 | (1) 3EGZ 1 B                                                                                                                                                                                                                                                                                                                                                    |
| 107 | NR_3.0_60469.1 | 4N0T 1 B (4N0T) | 1.7 Å | 65 | (3) 4N0T 1 B,<br>5TF6 1 B,<br>5TF6 1 D                                                                                                                                                                                                                                                                                                                          |
| 108 | NR_3.0_47330.1 | 3SKL 1 B (3SKL) | 2.9 Å | 64 | (4) 3SKL 1 B,<br>3SKL 1 A,<br>3SKW 1 A,                                                                                                                                                                                                                                                                                                                         |

|     |                |                 |       |    |  |                                                                               |
|-----|----------------|-----------------|-------|----|--|-------------------------------------------------------------------------------|
|     |                |                 |       |    |  | 3SKW 1 B                                                                      |
| 109 | NR_3.0_48352.1 | 4XWF 1 A (4XWF) | 1.8 Å | 64 |  | (2) 4XWF 1 A,<br>4XW7 1 A                                                     |
| 110 | NR_3.0_55424.1 | 3NKB 1 B (3NKB) | 1.9 Å | 64 |  | (1) 3NKB 1 B                                                                  |
| 111 | NR_3.0_63919.1 | 5B63 1 D (5B63) | 3.0 Å | 64 |  | (2) 5B63 1 D,<br>5B63 1 B                                                     |
| 112 | NR_3.0_83181.1 | 2DLC 1 Y (2DLC) | 2.4 Å | 64 |  | (1) 2DLC 1 Y                                                                  |
| 113 | NR_3.0_99632.2 | 1YFG 1 A (1YFG) | 3.0 Å | 64 |  | (1) 1YFG 1 A                                                                  |
| 114 | NR_3.0_82534.1 | 1F7U 1 B (1F7U) | 2.2 Å | 63 |  | (2) 1F7U 1 B,<br>1F7V 1 B                                                     |
| 115 | NR_3.0_03470.1 | 1SER 1 T (1SER) | 2.9 Å | 62 |  | (1) 1SER 1 T                                                                  |
| 116 | NR_3.0_06843.2 | 1EVV 1 A (1EVV) | 2.0 Å | 62 |  | (4) 1EVV 1 A,<br>1TTT 1 F,<br>1TTT 1 D,<br>1TTT 1 E                           |
| 117 | NR_3.0_51962.2 | 4YCP 1 B (4YCP) | 2.6 Å | 62 |  | (1) 4YCP 1 B                                                                  |
| 118 | NR_3.0_76901.1 | 5BTP 1 B (5BTP) | 2.8 Å | 62 |  | (2) 5BTP 1 B,<br>5BTP 1 A                                                     |
| 119 | NR_3.0_39792.1 | 4U7U 1 L (4U7U) | 3.0 Å | 61 |  | (2) 4U7U 1 L,<br>4U7U 1 X                                                     |
| 120 | NR_3.0_46720.2 | 5DDP 1 A (5DDP) | 2.3 Å | 61 |  | (4) 5DDP 1 A,<br>5DDP 1 B,<br>5DDR 1 B,<br>5DDR 1 A                           |
| 121 | NR_3.0_99751.1 | 2HVY 1 E (2HVY) | 2.3 Å | 61 |  | (1) 2HVY 1 E                                                                  |
| 122 | NR_3.0_23049.1 | 1KUQ 1 B (1KUQ) | 2.8 Å | 60 |  | (3) 1KUQ 1 B,<br>1F7Y 1 B,<br>1DK1 1 B                                        |
| 123 | NR_3.0_34126.1 | 3HAX 1 E (3HAX) | 2.1 Å | 60 |  | (1) 3HAX 1 E                                                                  |
| 124 | NR_3.0_70313.2 | 5H9F 1 L (5H9F) | 2.5 Å | 60 |  | (1) 5H9F 1 L                                                                  |
| 125 | NR_3.0_74932.1 | 6B44 1 M (6B44) | 2.9 Å | 60 |  | (1) 6B44 1 M                                                                  |
| 126 | NR_3.0_76909.1 | 3RW6 1 H (3RW6) | 2.3 Å | 60 |  | (2) 3RW6 1 H,<br>3RW6 1 F                                                     |
| 127 | NR_3.0_33278.1 | 5LYS 1 B (5LYS) | 2.3 Å | 59 |  | (6) 5LYS 1 B,<br>5LYV 1 B,<br>5LYS 1 A,<br>5LYU 1 B,<br>5LYU 1 A,<br>5LYV 1 A |
| 128 | NR_3.0_48748.1 | 5T5A 1 A (5T5A) | 2.0 Å | 59 |  | (1) 5T5A 1 A                                                                  |
| 129 | NR_3.0_52315.1 | 4M4O 1 B (4M4O) | 2.0 Å | 59 |  | (1) 4M4O 1 B                                                                  |
| 130 | NR_3.0_39651.1 | 3HJW 1 D (3HJW) | 2.4 Å | 58 |  | (6) 3HJW 1 D,<br>3LWV 1 D,<br>3LWR 1 D,<br>3LWP 1 D,<br>3LWO 1 D,<br>3LWQ 1 D |
| 131 | NR_3.0_74849.1 | 1MMS 1 C (1MMS) | 2.6 Å | 58 |  | (2) 1MMS 1 C,<br>1MMS 1 D                                                     |

|     |                |                             |       |    |                                                                                  |
|-----|----------------|-----------------------------|-------|----|----------------------------------------------------------------------------------|
| 132 | NR_3.0_36634.1 | 2QUW 1 B (2QUW)             | 2.2 Å | 57 | (2) 2QUW 1 B,<br>2QUW 1 D                                                        |
| 133 | NR_3.0_95614.1 | 1HC8 1 C (1HC8)             | 2.8 Å | 57 | (6) 1HC8 1 C,<br>1HC8 1 D,<br>1Y39 1 C,<br>1Y39 1 D,<br>1QA6 1 C,<br>1QA6 1 D    |
| 134 | NR_3.0_26186.1 | 4JRC 1 B (4JRC)             | 2.7 Å | 56 | (2) 4JRC 1 B,<br>4JRC 1 A                                                        |
| 135 | NR_3.0_68503.2 | 3F4H 1 Y+3F4H 1 X<br>(3F4H) | 3.0 Å | 56 | (2)<br>3F4H 1 Y+3F4H 1 <br>X,<br>6BFB 1 Y+6BFB 1 <br>X                           |
| 136 | NR_3.0_26582.1 | 4K27 1 U (4K27)             | 2.4 Å | 55 | (1) 4K27 1 U                                                                     |
| 137 | NR_3.0_46884.1 | 1MZP 1 B (1MZP)             | 2.7 Å | 55 | (1) 1MZP 1 B                                                                     |
| 138 | NR_3.0_55702.1 | 1C9S 1 W (1C9S)             | 1.9 Å | 55 | (1) 1C9S 1 W                                                                     |
| 139 | NR_3.0_18889.3 | 5C45 1 X+5C45 1 Y<br>(5C45) | 2.9 Å | 54 | (3)<br>5C45 1 X+5C45 1 <br>Y,<br>5KX9 1 X+5KX9 <br>1 Y,<br>2YIE 1 X+2YIE 1 <br>Z |
| 140 | NR_3.0_19502.2 | 4RGE 1 C (4RGE)             | 2.9 Å | 54 | (4) 4RGE 1 C,<br>4RGE 1 B,<br>4RGE 1 A,<br>5DUN 1 A                              |
| 141 | NR_3.0_24202.1 | 4PKD 1 V (4PKD)             | 2.5 Å | 54 | (1) 4PKD 1 V                                                                     |
| 142 | NR_3.0_79184.1 | 4GCW 1 B (4GCW)             | 3.0 Å | 53 | (2) 4GCW 1 B,<br>2FK6 1 R                                                        |
| 143 | NR_3.0_79951.1 | 4OJI 1 A (4OJI)             | 2.3 Å | 53 | (1) 4OJI 1 A                                                                     |
| 144 | NR_3.0_58167.1 | 3E5C 1 A (3E5C)             | 2.3 Å | 52 | (3) 3E5C 1 A,<br>3E5F 1 A,<br>3E5E 1 A                                           |
| 145 | NR_3.0_82984.1 | 4ENC 1 A (4ENC)             | 2.3 Å | 52 | (5) 4ENC 1 A,<br>4ENB 1 A,<br>3VRS 1 A,<br>4ENA 1 A,<br>4EN5 1 A                 |
| 146 | NR_3.0_83080.1 | 2QWY 1 C (2QWY)             | 2.8 Å | 52 | (3) 2QWY 1 C,<br>2QWY 1 A,<br>2QWY 1 B                                           |
| 147 | NR_3.0_83027.1 | 3NPQ 1 A (3NPQ)             | 2.2 Å | 51 | (4) 3NPQ 1 A,<br>3NPQ 1 C,<br>3NPQ 1 B,<br>3NPN 1 A                              |

138 The columns are number, equivalence class, representative structure, resolution, nucleotide  
139 length, and class member, respectively.
